# Supplementary material
Source: Elsevier journal article supplement (https://www.sciencedirect.com/science/article/pii/S0001651916300103)
Supplement: mmc1 [file S0001651916300103:mmc1.pdf]

## ANEXO 1. CUESTIONARIO DE DIFICULTADES DE LA DEGLUCIÓN.

Traducido de SDQ (*"Swallowing disturbance questionnaire"*). Manor et al [15].

Sexo: Hombre / Mujer. Edad: .Años de duración de la enfermedad:

**Pregunta general:** ¿Piensa usted que tiene problemas para comer y beber? SI ☐ NO ☐

|                                                                                                                           | 0     | 1                                          | 2                                             | 3                                                    |
|---------------------------------------------------------------------------------------------------------------------------|-------|--------------------------------------------|-----------------------------------------------|------------------------------------------------------|
|                                                                                                                           | Nunca | Pocas veces<br>(una vez un<br>mes o menos) | Con frecuencia<br>(1 a 7 veces por<br>semana) | Muy frecuentemente<br>(más de 7 veces por<br>semana) |
| <b>Preguntas</b>                                                                                                          |       |                                            |                                               |                                                      |
| 1. ¿Experimenta dificultad para masticar alimentos sólidos como una manzana, galleta o un caramelo masticable?            |       |                                            |                                               |                                                      |
| 2. ¿Hay restos de comida en la boca, mejillas, debajo de la lengua o pegado a tu paladar después de tragar?               |       |                                            |                                               |                                                      |
| 3. ¿Sale de la nariz alimento líquido cuando comes o bebes?                                                               |       |                                            |                                               |                                                      |
| 4. ¿Masticas la comida el doble que antes de tener la enfermedad?                                                         |       |                                            |                                               |                                                      |
| 5. ¿Crees que acumulas mucha saliva en la boca o que tienes problemas para tragar la saliva?                              |       |                                            |                                               |                                                      |
| 6. ¿Tienes que masticar la comida varias veces, antes de pasarla a la garganta?                                           |       |                                            |                                               |                                                      |
| 7. ¿Experimenta dificultades para pasar alimentos sólidos por la garganta (por ejemplo: manzanas, galletas)?              |       |                                            |                                               |                                                      |
| 8. ¿Experimenta dificultades para tragar alimentos tipo puré?                                                             |       |                                            |                                               |                                                      |
| 9. ¿Cuándo comes tienes sensación de tener un trozo de alimento atascado en la garganta?                                  |       |                                            |                                               |                                                      |
| 10. ¿Toses mientras tragas líquidos?                                                                                      |       |                                            |                                               |                                                      |
| 11. ¿Toses mientras tragas sólidos?                                                                                       |       |                                            |                                               |                                                      |
| 12. Inmediatamente después de comer o beber, ¿experimentas cambios en tu voz, como ronquera o voz reducida?               |       |                                            |                                               |                                                      |
| 13. Durante las comidas; ¿experimentas tos o dificultad respiratoria como resultado de la saliva que entra en tu tráquea? |       |                                            |                                               |                                                      |
| 14. ¿Experimentas dificultad en la respiración durante la comida?                                                         |       |                                            |                                               |                                                      |
| 15. ¿Ha sufrido de una infección respiratoria (neumonía, bronquitis) durante el año pasado?                               |       | SI                                         |                                               | NO                                                   |
